# Supplementary material for: Extended Versus Intermittent Meropenem Infusion in the Treatment of Nosocomial Pneumonia: A Retrospective Single-Center Study
Source: MDPI journal article supplement (doi:10.3390/antibiotics12101542), 2023-10-15
Supplement: s1 [file s1]

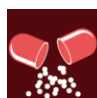

## Supplementary Materials

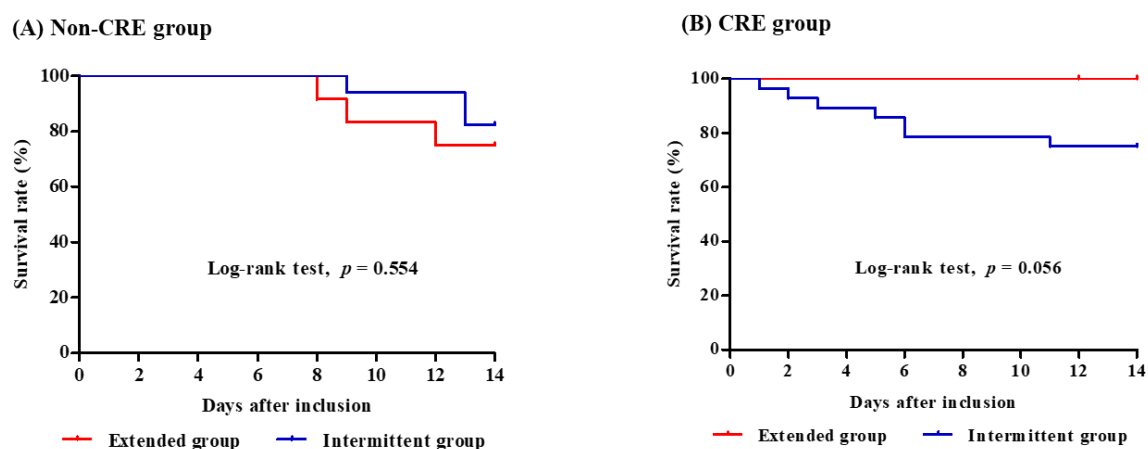

**Figure S1.** Mortality in subgroups at 14 days. (A) Non-carbapenem-resistant *Enterobacteriaceae* (CRE) and (B) CRE. CRE, carbapenem-resistant *Enterobacteriaceae*.

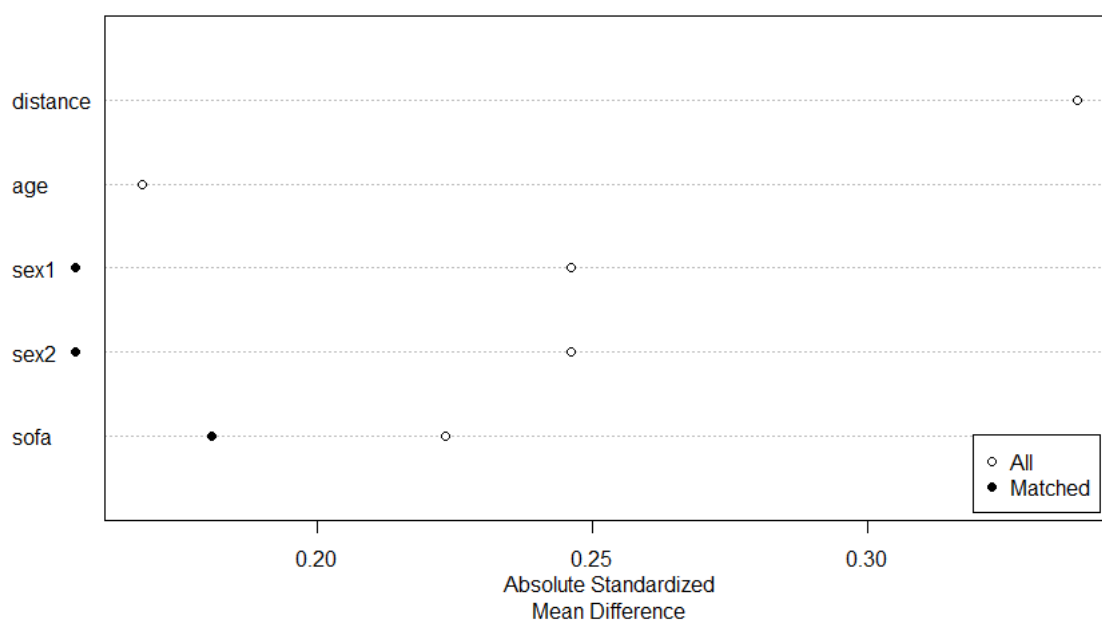

**Figure S2.** Absolute standardized mean differences between the extended infusion group and intermittent infusion group before and after propensity-score matching. Sofa; Sequential organ failure assessment.

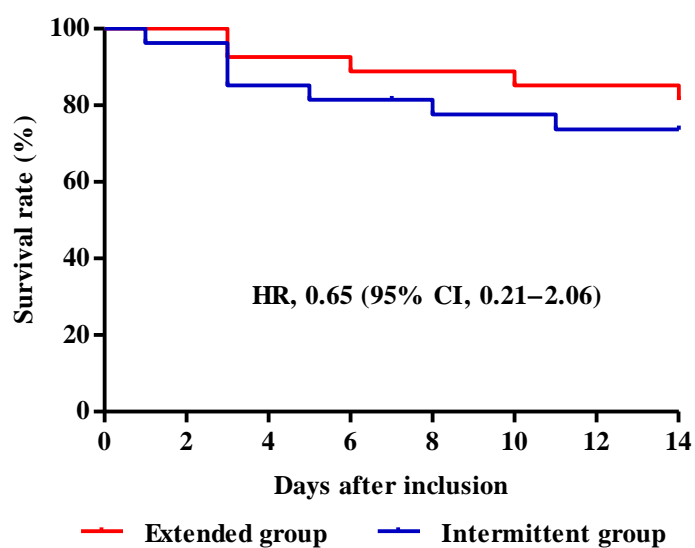

**Figure S3.** Time-to-event analysis after inclusion to day 14 in the propensity-score matched cohort. HR, hazard ratio; CI, confidence interval.

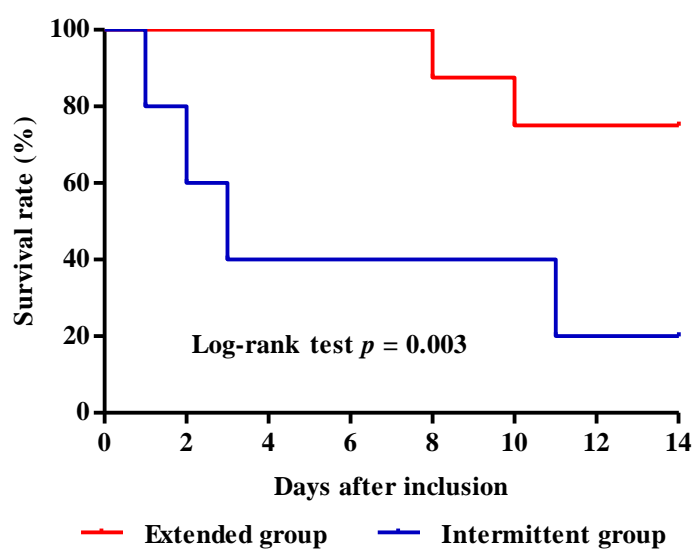

**Figure S4.** Time-to-event analysis after inclusion to day 14 in patients with concurrent bacteremia.

**Table S1.** Cox proportional hazards model of factors associated with mortality in all patients at 14 days.

| Variable                                       | Univariable Analysis |                  |                  | Multivariable Analysis |            |         |
|------------------------------------------------|----------------------|------------------|------------------|------------------------|------------|---------|
|                                                | HR                   | 95% CI           | p-value          | HR                     | 95% CI     | p-value |
| <b>Extended infusion</b>                       | <b>0.65</b>          | <b>0.31–1.37</b> | <b>0.260</b>     | 0.55                   | 0.23–1.31  | 0.174   |
| Age, y                                         | 1.00                 | 0.97–1.02        | 0.717            |                        |            |         |
| Sex, male                                      | 1.66                 | 0.81–3.39        | 0.166            |                        |            |         |
| BMI, kg/m <sup>2</sup>                         | 1.01                 | 0.94–1.09        | 0.753            |                        |            |         |
| Co-existing condition                          |                      |                  |                  |                        |            |         |
| Diabetes mellitus                              | 0.60                 | 0.26–1.39        | 0.232            |                        |            |         |
| <b>Solid cancer</b>                            | <b>3.22</b>          | <b>1.61–6.45</b> | <b>0.001</b>     | 2.22                   | 1.08–4.56  | 0.029   |
| Hematologic malignancy                         | 0.53                 | 0.19–1.51        | 0.236            |                        |            |         |
| Congestive heart failure                       | 0.34                 | 0.05–2.51        | 0.291            |                        |            |         |
| Respiratory failure                            | 0.45                 | 0.16–1.29        | 0.137            |                        |            |         |
| <b>Chronic liver disease</b>                   | <b>2.07</b>          | <b>0.89–4.79</b> | <b>0.089</b>     | 0.96                   | 0.33–2.79  | 0.936   |
| End-stage renal disease                        | 0.41                 | 0.10–1.73        | 0.227            |                        |            |         |
| Immunocompromised                              | 0.54                 | 0.22–1.31        | 0.173            |                        |            |         |
| Severity of pneumonia                          |                      |                  |                  |                        |            |         |
| <b>SOFA score</b>                              | <b>1.27</b>          | <b>1.13–1.42</b> | <b>&lt;0.001</b> | 1.19                   | 1.02–1.39  | 0.024   |
| Sepsis                                         | 1.80                 | 0.25–13.20       | 0.562            |                        |            |         |
| <b>Septic shock</b>                            | <b>2.86</b>          | <b>1.43–5.74</b> | <b>0.003</b>     | 1.59                   | 0.68–3.72  | 0.288   |
| PaO <sub>2</sub> /FiO <sub>2</sub> ratio, mmHg | 1.00                 | 0.99–1.00        | 0.167            |                        |            |         |
| Type of pneumonia                              |                      |                  |                  |                        |            |         |
| <b>VAP (vs. HAP)</b>                           | <b>2.33</b>          | <b>1.15–4.72</b> | <b>0.019</b>     | 2.83                   | 1.28–6.26  | 0.010   |
| Parameters of antibiotics                      |                      |                  |                  |                        |            |         |
| Previous antibiotic                            |                      |                  |                  |                        |            |         |
| Class of penicillin                            | 1.35                 | 0.68–2.71        | 0.391            |                        |            |         |
| Class of cephalosporin                         | 1.28                 | 0.55–2.96        | 0.564            |                        |            |         |
| <b>Class of quinolone</b>                      | <b>2.26</b>          | <b>1.13–4.53</b> | <b>0.021</b>     | 1.78                   | 0.85–3.71  | 0.125   |
| <b>Class of glycopeptide</b>                   | <b>2.57</b>          | <b>1.26–5.26</b> | <b>0.010</b>     | 1.83                   | 0.84–3.99  | 0.128   |
| Concomitant antibiotic                         | 3.66                 | 0.50–2.69        | 0.201            |                        |            |         |
| Use of colistin                                | 0.67                 | 0.20–2.18        | 0.502            |                        |            |         |
| Coverage for MRSA                              | 1.90                 | 0.82–4.40        | 0.133            |                        |            |         |
| Laboratory variables                           |                      |                  |                  |                        |            |         |
| White cell count, × 10 <sup>3</sup> /L         | 1.01                 | 0.97–1.05        | 0.554            |                        |            |         |
| C-reactive protein, mg/dL                      | 0.99                 | 0.95–1.03        | 0.620            |                        |            |         |
| Procalcitonin, ng/mL                           | 0.99                 | 0.94–1.04        | 0.674            |                        |            |         |
| Lactate level, mmol/L                          | 1.10                 | 0.99–1.21        | 0.065            |                        |            |         |
| Organ support at baseline                      |                      |                  |                  |                        |            |         |
| Mechanical ventilation                         | 23.38                | 0.13–4252.45     | 0.235            |                        |            |         |
| RRT                                            | 1.67                 | 0.79–3.53        | 0.177            |                        |            |         |
| ECMO                                           | 0.98                 | 0.34–2.78        | 0.964            |                        |            |         |
| Vasopressor                                    | 2.06                 | 0.93–4.59        | 0.076            |                        |            |         |
| Microbiologic profile                          |                      |                  |                  |                        |            |         |
| <b>Bacteremia</b>                              | <b>3.44</b>          | <b>1.41–8.36</b> | <b>0.006</b>     | 7.14                   | 2.29–22.31 | 0.001   |
| Pathogen of sputum culture                     |                      |                  |                  |                        |            |         |
| Gram(+) pathogen                               | 0.45                 | 0.06–3.31        | 0.435            |                        |            |         |
| Gram(-) pathogen                               | 0.89                 | 0.44–1.81        | 0.756            |                        |            |         |

Abbreviations: HR, hazard ratio; CI, confidence interval; BMI, body mass index; SOFA, sequential organ failure assessment; PaO<sub>2</sub>, partial oxygen pressure in arterial blood; FiO<sub>2</sub>, fraction of inspired oxygen; VAP, ventilator-associated pneumonia; HAP, hospital-acquired pneumonia; MRSA, methicillin-resistant *Staphylococcus aureus*; RRT, renal replacement therapy; ECMO, extracorporeal membrane oxygenation.

**Table S2.** Cox proportional hazards model of factors associated with ICU discharge in all patients at 14 days.

| Variable                                       | Univariable Analysis |                  |              | Multivariable Analysis |              |         |
|------------------------------------------------|----------------------|------------------|--------------|------------------------|--------------|---------|
|                                                | HR                   | 95% CI           | p-value      | HR                     | 95% CI       | p-value |
| <b>Extended infusion</b>                       | <b>0.913</b>         | <b>0.56–1.49</b> | <b>0.72</b>  | 0.767                  | 0.4366–1.348 | 0.36    |
| Age, y                                         | 0.996                | 0.98–1.01        | 0.66         |                        |              |         |
| Sex, female                                    | 1.04                 | 0.63–1.74        | 0.87         |                        |              |         |
| BMI, kg/m <sup>2</sup>                         | 1.03                 | 0.97–1.09        | 0.37         |                        |              |         |
| Co-existing condition                          |                      |                  |              |                        |              |         |
| Diabetes mellitus                              | 0.855                | 0.52–1.4         | 0.53         |                        |              |         |
| <b>Solid cancer</b>                            | <b>1.61</b>          | <b>0.95–2.73</b> | <b>0.08</b>  | 1.777                  | 0.8385–3.764 | 0.1300  |
| <b>Hematologic malignancy</b>                  | <b>1.94</b>          | <b>1.18–3.18</b> | <b>0.009</b> | 1.866                  | 0.9982–3.489 | 0.0510  |
| Congestive heart failure                       | 0.514                | 0.18–1.50        | 0.22         |                        |              |         |
| <b>Respiratory failure</b>                     | <b>0.459</b>         | <b>0.24–0.86</b> | <b>0.022</b> | 0.809                  | 0.3603–1.816 | 0.6100  |
| End-stage renal disease                        | 0.782                | 0.36–1.71        | 0.54         |                        |              |         |
| Chronic liver disease                          | 1.04                 | 0.50–2.17        | 0.92         |                        |              |         |
| Immunocompromised                              | 1.19                 | 0.72–1.96        | 0.50         |                        |              |         |
| Severity of pneumonia                          |                      |                  |              |                        |              |         |
| SOFA score                                     | 0.992                | 0.93–1.06        | 0.82         |                        |              |         |
| Sepsis                                         | 0.472                | 0.19–1.18        | 0.110        |                        |              |         |
| Septic shock                                   | 1.38                 | 0.76–2.47        | 0.272        |                        |              |         |
| PaO <sub>2</sub> /FiO <sub>2</sub> ratio, mmHg | 1.00                 | 0.99–1.000       | 0.25         |                        |              |         |
| Type of pneumonia                              |                      |                  |              |                        |              |         |
| VAP (vs. HAP)                                  | 0.772                | 0.47–1.28        | 0.31         |                        |              |         |
| Parameters of antibiotics                      |                      |                  |              |                        |              |         |
| Previous antibiotic                            |                      |                  |              |                        |              |         |
| Class of penicillin                            | 1.06                 | 0.66–1.71        | 0.81         |                        |              |         |
| Class of cephalosporin                         | 1.0                  | 0.55–1.84        | 0.99         |                        |              |         |
| <b>Class of quinolone</b>                      | <b>1.65</b>          | <b>1.01–2.70</b> | <b>0.045</b> | 1.273                  | 0.7520–2.155 | 0.3700  |
| Class of glycopeptide                          | 0.72                 | 0.36–1.44        | 0.35         |                        |              |         |
| Concomitant antibiotic                         |                      |                  |              |                        |              |         |
| <b>Use of colistin</b>                         | <b>0.215</b>         | <b>0.05–0.86</b> | <b>0.03</b>  | 0.245                  | 0.0515–1.171 | 0.0780  |
| Coverage for MRSA                              | 1.31                 | 0.75–2.3         | 0.35         |                        |              |         |
| Laboratory variables                           |                      |                  |              |                        |              |         |
| White cell count, × 10 <sup>3</sup> /L         | 1.01                 | 0.98–1.04        | 0.39         |                        |              |         |
| C-reactive protein, mg/dL                      | 1.01                 | 0.99–1.04        | 0.33         |                        |              |         |
| Procalcitonin, ng/mL                           | 0.985                | 0.96–1.01        | 0.19         |                        |              |         |
| <b>Lactate level, mmol/L</b>                   | <b>1.04</b>          | <b>1.00–1.09</b> | <b>0.049</b> | 1.018                  | 0.9653–1.073 | 0.5100  |
| Organ support at baseline                      |                      |                  |              |                        |              |         |
| <b>Mechanical ventilation</b>                  | <b>0.385</b>         | <b>0.20–0.75</b> | <b>0.005</b> | 0.355                  | 0.1738–0.724 | 0.0044  |
| RRT                                            | 0.96                 | 0.54–1.70        | 0.89         |                        |              |         |
| ECMO                                           | 0.569                | 0.27–1.19        | 0.13         |                        |              |         |
| Vasopressor                                    | 1.17                 | 0.71–1.94        | 0.55         |                        |              |         |
| Microbiologic profile                          |                      |                  |              |                        |              |         |
| Bacteremia                                     | 1.1                  | 0.40–3.06        | 0.85         |                        |              |         |
| Pathogen of sputum culture                     |                      |                  |              |                        |              |         |
| Gram(+) pathogen                               | 0.435                | 0.11–1.68        | 0.23         |                        |              |         |
| Gram(-) pathogen                               | 0.661                | 0.397–1.1        | 0.11         |                        |              |         |

Abbreviations: HR, hazard ratio; CI, confidence interval; BMI, body mass index; SOFA, sequential organ failure assessment; PaO<sub>2</sub>, partial oxygen pressure in arterial blood; FiO<sub>2</sub>, fraction of inspired oxygen; VAP, ventilator-associated pneumonia; HAP, hospital-acquired pneumonia; MRSA, methicillin-resistant *Staphylococcus aureus*; RRT, renal replacement therapy; ECMO, extracorporeal membrane oxygenation.

**Table S3.** Cox proportional hazards model of factors associated with ventilator liberation in all patients at 14 days.

| Variable                               | Univariable Analysis |                  |              | Multivariable Analysis |           |         |
|----------------------------------------|----------------------|------------------|--------------|------------------------|-----------|---------|
|                                        | HR                   | 95% CI           | p-value      | HR                     | 95% CI    | p-value |
| <b>Extended infusion</b>               | <b>1.07</b>          | <b>0.62–1.82</b> | <b>0.82</b>  | 0.93                   | 0.51–1.68 | 0.800   |
| Age, y                                 | 0.99                 | 0.97–1.01        | 0.34         |                        |           |         |
| Sex, female                            | 1.18                 | 0.68–2.06        | 0.56         |                        |           |         |
| BMI, kg/m <sup>2</sup>                 | 1.03                 | 0.98–1.09        | 0.22         |                        |           |         |
| Co-existing condition                  |                      |                  |              |                        |           |         |
| Diabetes mellitus                      | 0.72                 | 0.39–1.32        | 0.29         |                        |           |         |
| Solid cancer                           | 1.04                 | 0.56–1.93        | 0.90         |                        |           |         |
| Hematologic malignancy                 | 1.33                 | 0.72–2.45        | 0.36         |                        |           |         |
| Congestive heart failure               | 0.72                 | 0.29–1.77        | 0.47         |                        |           |         |
| Respiratory failure                    | 0.65                 | 0.33–1.28        | 0.21         |                        |           |         |
| End-stage renal disease                | 0.62                 | 0.26–1.49        | 0.28         |                        |           |         |
| Chronic liver disease                  | 0.67                 | 0.26–1.69        | 0.40         |                        |           |         |
| Immunocompromised                      | 1.11                 | 0.63–1.96        | 0.72         |                        |           |         |
| Severity of pneumonia                  |                      |                  |              |                        |           |         |
| SOFA score                             | 0.956                | 0.90–1.02        | 0.18         |                        |           |         |
| Sepsis                                 | 1.16                 | 0.42–3.20        | 0.78         |                        |           |         |
| Septic shock                           | 1.69                 | 0.94–3.04        | 0.08         |                        |           |         |
| <b>PaO2/FiO2 ratio, mmHg</b>           | <b>1.00</b>          | <b>1.00–1.00</b> | <b>0.02</b>  | 1.00                   | 0.99–0.99 | 1.00    |
| Type of pneumonia                      |                      |                  |              |                        |           |         |
| VAP (vs. HAP)                          | 1.05                 | 0.61–1.81        | 0.86         |                        |           |         |
| Parameters of antibiotics              |                      |                  |              |                        |           |         |
| Previous antibiotic                    |                      |                  |              |                        |           |         |
| Class of penicillin                    | 1.27                 | 0.75–2.15        | 0.38         |                        |           |         |
| Class of cephalosporin                 | 0.74                 | 0.34–1.64        | 0.46         |                        |           |         |
| Class of quinolone                     | 1.15                 | 0.65–2.03        | 0.63         |                        |           |         |
| Class of glycopeptide                  | 0.69                 | 0.35–1.37        | 0.28         |                        |           |         |
| Concomitant antibiotic                 |                      |                  |              |                        |           |         |
| <b>Use of colistin</b>                 | <b>0.21</b>          | <b>0.05–0.85</b> | <b>0.029</b> | 0.24                   | 0.06–1.01 | 0.052   |
| Coverage for MRSA                      | 1.47                 | 0.82–2.64        | 0.20         |                        |           |         |
| Laboratory variables                   |                      |                  |              |                        |           |         |
| White cell count, × 10 <sup>3</sup> /L | 0.99                 | 0.95–1.03        | 0.51         |                        |           |         |
| C-reactive protein, mg/dL              | 1.01                 | 0.98–1.04        | 0.60         |                        |           |         |
| Procalcitonin, ng/mL                   | 0.98                 | 0.93–1.03        | 0.34         |                        |           |         |
| <b>Lactate level, mmol/L</b>           | <b>1.09</b>          | <b>1.02–1.16</b> | <b>0.007</b> | 1.02                   | 0.93–1.13 | 0.670   |
| Organ support at baseline              |                      |                  |              |                        |           |         |
| Mechanical ventilation                 | 0.77                 | 0.38–1.55        | 0.46         |                        |           |         |
| RRT                                    | 0.79                 | 0.41–1.51        | 0.48         |                        |           |         |
| ECMO                                   | 0.82                 | 0.36–1.87        | 0.63         |                        |           |         |
| Vasopressor                            | 0.93                 | 0.54–1.59        | 0.79         |                        |           |         |
| Microbiologic profile                  |                      |                  |              |                        |           |         |
| Bacteremia                             | 0.58                 | 0.18–1.90        | 0.37         |                        |           |         |
| Pathogen of sputum culture             |                      |                  |              |                        |           |         |
| Gram(+) pathogen                       | 0.48                 | 0.12–1.99        | 0.31         |                        |           |         |
| Gram(-) pathogen                       | 0.80                 | 0.47–1.36        | 0.41         |                        |           |         |

Abbreviations: HR, hazard ratio; CI, confidence interval; BMI, body mass index; SOFA, sequential organ failure assessment; PaO<sub>2</sub>, partial oxygen pressure in arterial blood; FiO<sub>2</sub>, fraction of inspired oxygen; VAP, ventilator-associated pneumonia; HAP, hospital-acquired pneumonia; MRSA, methicillin-resistant *Staphylococcus aureus*; RRT, renal replacement therapy; ECMO, extracorporeal membrane oxygenation.

**Table S4.** Cox proportional hazards model of factors associated with mortality at 14 days in the subgroup with empirical treatment.

| Variable                                       | Univariable analysis |                   |              | Multivariable analysis |             |         |
|------------------------------------------------|----------------------|-------------------|--------------|------------------------|-------------|---------|
|                                                | HR                   | 95% CI            | p-value      | HR                     | 95% CI      | p-value |
| <b>Extended infusion</b>                       | <b>0.26</b>          | <b>0.06–1.22</b>  | <b>0.087</b> | 0.17                   | 0.03–0.96   | 0.045   |
| Age, y                                         | 0.99                 | 0.96–1.03         | 0.572        |                        |             |         |
| Sex, female                                    | 1.50                 | 0.40–5.64         | 0.552        |                        |             |         |
| BMI, kg/m <sup>2</sup>                         | 0.98                 | 0.84–1.16         | 0.838        |                        |             |         |
| Co-existing condition                          |                      |                   |              |                        |             |         |
| Diabetes mellitus                              | 1.35                 | 0.40–4.62         | 0.630        |                        |             |         |
| <b>Solid cancer</b>                            | <b>3.85</b>          | <b>1.17–12.65</b> | <b>0.026</b> | 2.11                   | 0.52–8.55   | 0.297   |
| Hematologic malignancy                         | 1.28                 | 0.34–4.81         | 0.720        |                        |             |         |
| Congestive heart failure                       | 0.04                 | 0.00–419.35       | 0.502        |                        |             |         |
| Respiratory failure                            | 0.41                 | 0.05–3.22         | 0.398        |                        |             |         |
| End-stage renal disease                        | 0.57                 | 0.07–4.48         | 0.596        |                        |             |         |
| Chronic liver disease                          | 1.68                 | 0.36–7.72         | 0.514        |                        |             |         |
| Immunocompromised                              | 0.76                 | 0.20–2.85         | 0.680        |                        |             |         |
| Severity of pneumonia                          |                      |                   |              |                        |             |         |
| <b>SOFA score</b>                              | <b>1.16</b>          | <b>0.98–1.36</b>  | <b>0.086</b> | 1.19                   | 0.96–1.48   | 0.114   |
| Sepsis                                         | 21.82                | 0.00–             | 0.606        |                        |             |         |
| Septic shock                                   | 2.23                 | 0.65–7.63         | 0.202        |                        |             |         |
| PaO <sub>2</sub> /FiO <sub>2</sub> ratio, mmHg | 0.99                 | 0.99–1.00         | 0.673        |                        |             |         |
| Type of pneumonia                              |                      |                   |              |                        |             |         |
| <b>VAP (vs. HAP)</b>                           | <b>7.68</b>          | <b>2.33–25.34</b> | <b>0.001</b> | 24.47                  | 4.58–130.83 | <0.001  |
| Parameters of antibiotics                      |                      |                   |              |                        |             |         |
| Previous antibiotic                            |                      |                   |              |                        |             |         |
| <b>Class of penicillin</b>                     | <b>3.94</b>          | <b>1.15–13.49</b> | <b>0.029</b> | 0.19                   | 0.03–1.35   | 0.097   |
| Class of cephalosporin                         | 0.88                 | 0.11–6.87         | 0.902        |                        |             |         |
| <b>Class of quinolone</b>                      | <b>4.86</b>          | <b>1.28–18.44</b> | <b>0.020</b> | 12.42                  | 1.50–102.84 | 0.019   |
| Class of glycopeptide                          | 5.73                 | 1.74–18.86        | 0.004        |                        |             |         |
| Concomitant antibiotic                         |                      |                   |              |                        |             |         |
| Use of colistin                                | 1.64                 | 0.35–7.58         | 0.529        |                        |             |         |
| Coverage for MRSA                              | 1.98                 | 0.43–9.14         | 0.384        |                        |             |         |
| Laboratory variables                           |                      |                   |              |                        |             |         |
| White cell count, × 10 <sup>3</sup> /L         | 1.04                 | 0.97–1.11         | 0.296        |                        |             |         |
| C-reactive protein, mg/dL                      | 1.03                 | 0.96–1.10         | 0.444        |                        |             |         |
| Procalcitonin, ng/mL                           | 0.99                 | 0.94–1.044        | 0.781        |                        |             |         |
| Lactate level, mmol/L                          | 1.06                 | 0.92–1.23         | 0.404        |                        |             |         |
| Organ support at baseline                      |                      |                   |              |                        |             |         |
| Mechanical ventilation                         | 23.12                | 0.00–             | 0.502        |                        |             |         |
| RRT                                            | 2.51                 | 0.77–8.25         | 0.128        |                        |             |         |
| ECMO                                           | 1.46                 | 0.32–6.75         | 0.630        |                        |             |         |
| Vasopressor                                    | 1.20                 | 0.35–4.12         | 0.767        |                        |             |         |
| Microbiologic profile                          |                      |                   |              |                        |             |         |
| Bacteremia                                     | 1.96                 | 0.42–9.07         | 0.390        |                        |             |         |
| Pathogen of sputum culture                     |                      |                   |              |                        |             |         |
| Gram(+) pathogen                               | 0.05                 | 0.00–5594.73      | 0.606        |                        |             |         |
| Gram(-) pathogen                               | 1.25                 | 0.38–4.08         | 0.718        |                        |             |         |

Abbreviations: HR, hazard ratio; CI, confidence interval; BMI, body mass index; SOFA, sequential organ failure assessment; PaO<sub>2</sub>, partial oxygen pressure in arterial blood; FiO<sub>2</sub>, fraction of inspired oxygen; VAP, ventilator-associated pneumonia; HAP, hospital-acquired pneumonia; MRSA, methicillin-resistant *Staphylococcus aureus*; RRT, renal replacement therapy; ECMO, extracorporeal membrane oxygenation.

**Table S5.** Cox proportional hazards model of factors associated with mortality at 14 days in the subgroup of culture-proven patients.

| Variable                                       | Univariable Analysis |                   |                  | Multivariable Analysis |              |         |
|------------------------------------------------|----------------------|-------------------|------------------|------------------------|--------------|---------|
|                                                | HR                   | 95% CI            | p-value          | HR                     | 95% CI       | p-value |
| <b>Extended infusion</b>                       | <b>0.51</b>          | <b>0.14–1.84</b>  | <b>0.300</b>     | 0.10                   | 0.01–0.83    | 0.033   |
| Age, y                                         | 1.00                 | 0.97–1.04         | 0.849            |                        |              |         |
| Sex, female                                    | 1.24                 | 0.41–3.81         | 0.701            |                        |              |         |
| BMI, kg/m <sup>2</sup>                         | 1.02                 | 0.89–1.16         | 0.794            |                        |              |         |
| Co-existing condition                          |                      |                   |                  |                        |              |         |
| Diabetes mellitus                              | 0.53                 | 0.12–2.38         | 0.406            |                        |              |         |
| Solid cancer                                   | 2.40                 | 0.74–7.82         | 0.145            |                        |              |         |
| Hematologic malignancy                         | 0.63                 | 0.08–4.85         | 0.658            |                        |              |         |
| Respiratory failure                            | 0.55                 | 0.15–1.98         | 0.357            |                        |              |         |
| End-stage renal disease                        | 0.78                 | 0.17–3.51         | 0.743            |                        |              |         |
| <b>Chronic liver disease</b>                   | <b>4.91</b>          | <b>1.64–1.47</b>  | <b>0.004</b>     | 4.70                   | 0.77–28.63   | 0.093   |
| Severity of pneumonia                          |                      |                   |                  |                        |              |         |
| <b>SOFA score</b>                              | <b>1.17</b>          | <b>1.00–1.36</b>  | <b>0.051</b>     | 1.04                   | 0.84–1.28    | 0.713   |
| <b>Septic shock</b>                            | <b>5.25</b>          | <b>1.71–16.09</b> | <b>0.004</b>     | 8.33                   | 1.57–44.27   | 0.013   |
| PaO <sub>2</sub> /FiO <sub>2</sub> ratio, mmHg | 1.00                 | 1.00–1.00         | 0.804            |                        |              |         |
| Type of pneumonia                              |                      |                   |                  |                        |              |         |
| VAP (vs. HAP)                                  | 2.00                 | 0.65–6.11         | 0.225            |                        |              |         |
| Parameters of antibiotics                      |                      |                   |                  |                        |              |         |
| Previous antibiotic                            |                      |                   |                  |                        |              |         |
| Class of penicillin                            | 2.00                 | 0.65–6.10         | 0.225            |                        |              |         |
| Class of cephalosporin                         | 1.29                 | 0.35–4.67         | 0.703            |                        |              |         |
| <b>Class of quinolone</b>                      | <b>3.55</b>          | <b>1.09–1.16</b>  | <b>0.035</b>     | 1.06                   | 0.20–5.51    | 0.950   |
| Class of glycopeptide                          | 3.02                 | 0.99–9.25         | 0.053            |                        |              |         |
| Concomitant antibiotic                         |                      |                   |                  |                        |              |         |
| Use of colistin                                | 0.93                 | 0.25–3.37         | 0.907            |                        |              |         |
| Coverage for MRSA                              | 1.77                 | 0.55–5.76         | 0.340            |                        |              |         |
| Laboratory variables                           |                      |                   |                  |                        |              |         |
| White cell count, × 10 <sup>3</sup> /L         | 0.95                 | 0.86–1.05         | 0.299            |                        |              |         |
| C-reactive protein, mg/dL                      | 0.97                 | 0.90–1.05         | 0.499            |                        |              |         |
| Procalcitonin, ng/mL                           | 1.07                 | 0.97–1.17         | 0.186            |                        |              |         |
| Lactate level, mmol/L                          | 1.09                 | 0.97–1.22         | 0.133            |                        |              |         |
| Organ support at baseline                      |                      |                   |                  |                        |              |         |
| RRT                                            | 0.61                 | 0.14–2.76         | 0.522            |                        |              |         |
| ECMO                                           | 1.40                 | 0.39–5.10         | 0.607            |                        |              |         |
| Vasopressor                                    | 1.86                 | 0.57–6.06         | 0.300            |                        |              |         |
| Microbiologic profile                          |                      |                   |                  |                        |              |         |
| <b>Bacteremia</b>                              | <b>8.02</b>          | <b>2.60–2.47</b>  | <b>&lt;0.001</b> | 29.48                  | 5.36–161.99  | <0.001  |
| Pathogen of sputum culture                     |                      |                   |                  |                        |              |         |
| <b>Gram(+) pathogen</b>                        | <b>8.65</b>          | <b>1.08–6.94</b>  | <b>0.042</b>     | 154.62                 | 3.47–6885.79 | 0.009   |

Abbreviations: HR, hazard ratio; CI, confidence interval; BMI, body mass index; SOFA, sequential organ failure assessment; PaO<sub>2</sub>, partial oxygen pressure in arterial blood; FiO<sub>2</sub>, fraction of inspired oxygen; VAP, ventilator-associated pneumonia; HAP, hospital-acquired pneumonia; MRSA, methicillin-resistant *Staphylococcus aureus*; RRT, renal replacement therapy; ECMO, extracorporeal membrane oxygenation.

**Table S6.** Baseline characteristics of the propensity-score matched cohorts.

| Variable                                                 | Extended (n = 27)      | Intermittent (n = 27)  | SMD   |
|----------------------------------------------------------|------------------------|------------------------|-------|
| Age, y                                                   | 65.48 ± 11.30          | 65.04 ± 13.26          | 0.036 |
| Sex, female                                              | 4 (14.8)               | 6 (22.2)               | 0.192 |
| BMI, kg/m <sup>2</sup>                                   | 23.50 (21.47–24.97)    | 20.50 (18.23–23.14)    | 0.662 |
| <b>Co-existing condition</b>                             |                        |                        |       |
| Diabetes mellitus                                        | 11 (40.7)              | 8 (29.6)               | 0.234 |
| Solid cancer                                             | 8 (29.6)               | 10 (37.0)              | 0.158 |
| Hematologic malignancy                                   | 4 (14.8)               | 3 (11.1)               | 0.11  |
| Congestive heart failure                                 | 3 (11.1)               | 1 (3.7)                | 0.286 |
| Chronic liver disease                                    | 4 (14.8)               | 5 (18.5)               | 0.1   |
| End-stage renal disease                                  | 1 (3.7)                | 3 (11.1)               | 0.286 |
| Immunocompromised                                        | 8 (29.6)               | 4 (14.8)               | 0.362 |
| <b>Severity of pneumonia</b>                             |                        |                        |       |
| SOFA score                                               | 10.00 (8.00–12.50)     | 11.00 (9.00–13.50)     | 0.184 |
| Septic shock                                             | 5 (18.5)               | 13 (48.1)              | 0.662 |
| PaO <sub>2</sub> /FiO <sub>2</sub> ratio, mmHg (n = 157) | 179.75 (146.39–248.86) | 151.00 (113.44–249.45) | 0.089 |
| <b>Type of nosocomial pneumonia</b>                      |                        |                        |       |
| Ventilator-associated pneumonia                          | 11 (40.7)              | 7 (25.9)               | 0.318 |
| <b>Organ support at baseline</b>                         |                        |                        |       |
| Renal replacement therapy                                | 10 (37.0)              | 7 (25.9)               | 0.241 |
| Extracorporeal membrane oxygenation                      | 4 (14.8)               | 3 (11.1)               | 0.11  |
| <b>Bacteremia</b>                                        | 2 (7.4)                | 3 (11.1)               | 0.128 |

Abbreviations: SMD; standardized mean difference, BMI, body mass index; SOFA, sequential organ failure assessment; PaO<sub>2</sub>, partial oxygen pressure in arterial blood; FiO<sub>2</sub>, fraction of inspired oxygen. Data are reported as n (%), mean ± standard deviation, or median (interquartile range).



**Table S7.** Baseline characteristics of patients with concurrent bacteremia according to the type of meropenem infusion.

| Variable                                         | Extended (n = 8) | Intermittent (n = 5) |
|--------------------------------------------------|------------------|----------------------|
| Age, y                                           | 66.5 (60.0–72.3) | 55.0 (35.5–71.5)     |
| Sex, male                                        | 4 (50.0)         | 2 (40.0)             |
| <b>Severity of pneumonia</b>                     |                  |                      |
| SOFA score                                       | 12.0 (10.0–15.5) | 11.0 (6.5–17.0)      |
| Septic shock                                     | 1 (12.5)         | 3 (60.0)             |
| <b>Organ support</b>                             |                  |                      |
| Renal replacement therapy                        | 1 (12.5)         | 1 (20.0)             |
| Extracorporeal membrane oxygenation              | 0 (0.0)          | 2 (40.0)             |
| <b>Type of nosocomial pneumonia</b>              |                  |                      |
| Ventilator-associated pneumonia                  | 8 (100.0)        | 4 (80.0)             |
| <b>Pathogen of bacteremia</b>                    |                  |                      |
| <i>Staphylococcus aureus</i>                     | 3 (37.5)         | 0 (0.0)              |
| <i>Enterococcus faecium</i>                      | 3 (37.5)         | 0 (0.0)              |
| <i>Klebsiella pneumoniae</i>                     | 2 (25.0)         | 0 (0.0)              |
| <i>Acinetobacter baumannii</i>                   | 0 (0.0)          | 4 (80.0)             |
| <i>Pseudomonas aeruginosa</i>                    | 0 (0.0)          | 1 (20.0)             |
| <b>Pathogen of sputum culture</b>                |                  |                      |
| <i>Staphylococcus aureus</i>                     | 1 (12.5)         | 0 (0.0)              |
| <i>Klebsiella pneumoniae</i> or <i>oxytica</i>   | 2 (25.0)         | 0 (0.0)              |
| <i>Acinetobacter baumannii</i> or <i>iwoffii</i> | 1 (12.5)         | 4 (80.0)             |
| <i>Pseudomonas aeruginosa</i>                    | 0 (0.0)          | 1 (20.0)             |
| <b>Concomitant antibiotics</b>                   |                  |                      |
| Use of colistin                                  | 0 (0.0)          | 3 (60.0)             |
| Coverage for MRSA                                | 3 (37.5)         | 3 (60.0)             |
| 14-day mortality                                 | 2 (25.0)         | 4 (80.0)             |

Abbreviations: SOFA, sequential organ failure assessment; MRSA, methicillin-resistant *Staphylococcus aureus*. Data are reported as n (%), or median (interquartile range).
